# Supplementary material for: Impact of new models on internal dose estimates for radiopharmaceuticals
Source: JCI journal article supplement (doi:10.1172/jci.insight.167215), 2010-05-01
Supplement: sd1 [file 1]

## SUPPLEMENTARY DATA

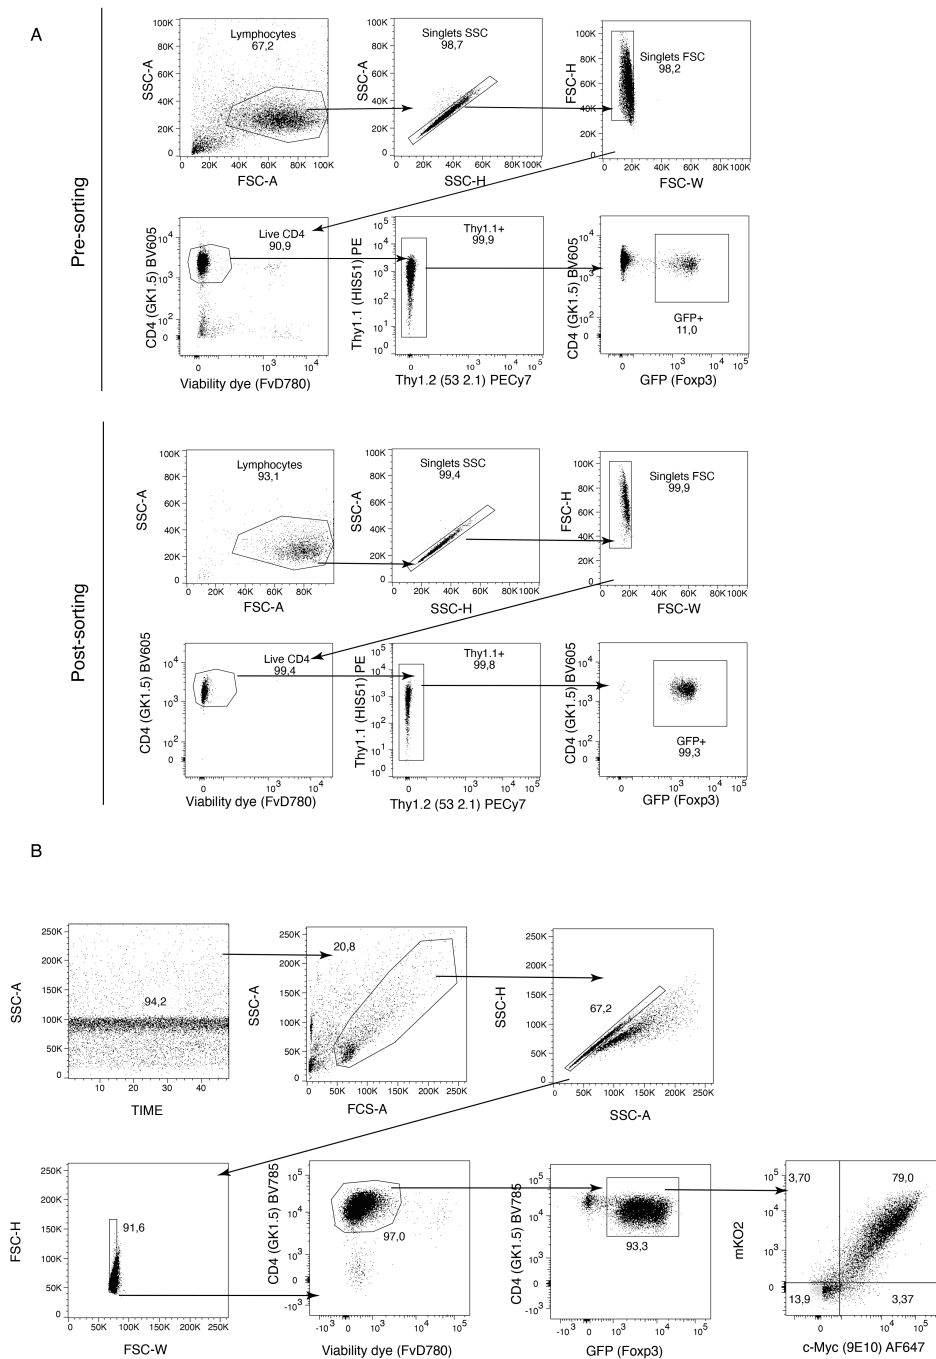

**Supplementary Figure 1. Sorting and purity check flow panels. (A)** Representative data of at least 5 independent experiments showing the pre- and post-sorting flow panel used to isolate Tregs (defined as live CD4+CD8-Thy1.1+Foxp3<sup>gfp</sup>+ cells). **(B)** Representative data of at least 5 independent experiments showing the flow panel used to check Treg purity and CAR-expression after Treg expansion at day 7.

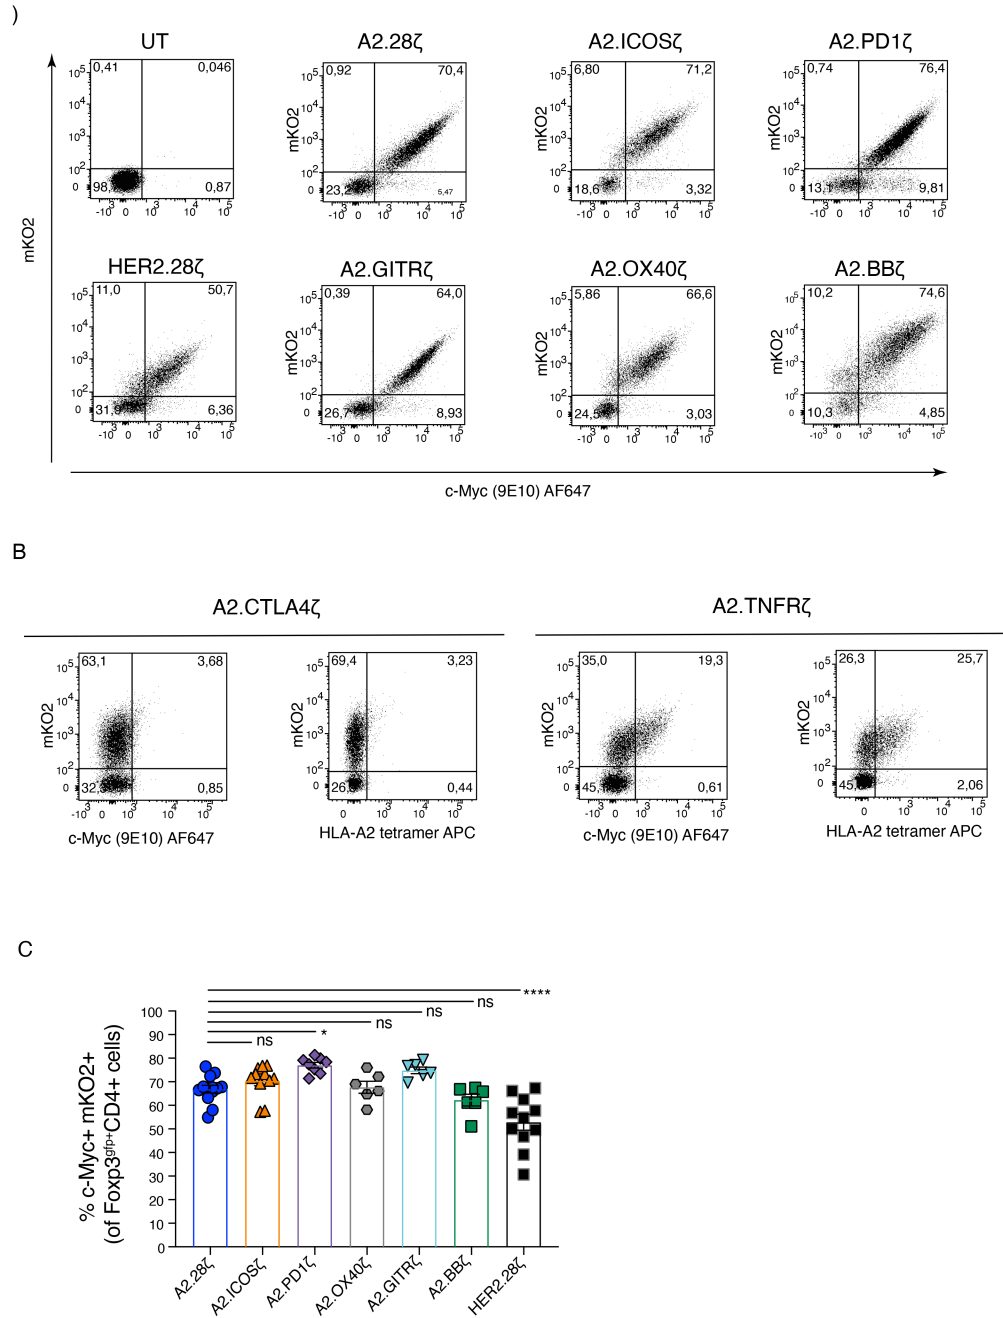

**Supplementary Figure 2: Co-stimulatory domain variant CAR expression:** (A) Representative data of at least 5 independent experiments showing the expression of co-stimulatory domain CAR variants defined by c-Myc and mKO2 co-expression in Tregs. (B) Lack of CAR expression or binding to HLA-A2 for the CTLA4- and TNFR2-based CAR variants. (C) Frequencies of c-Myc and mKO2 co-expression in Tregs, gated in live CD4+foxp3<sup>fp</sup>+ cells; n=6 to 13 replicates from at least 8 independent experiments. Data shown as mean±SEM. Statistical significance was determined using one-way ANOVA with a Holm-Sidak post-test, \*p<0.05, \*\*p<0.01, \*\*\*p<0.001, \*\*\*\*p<0.0001.

A

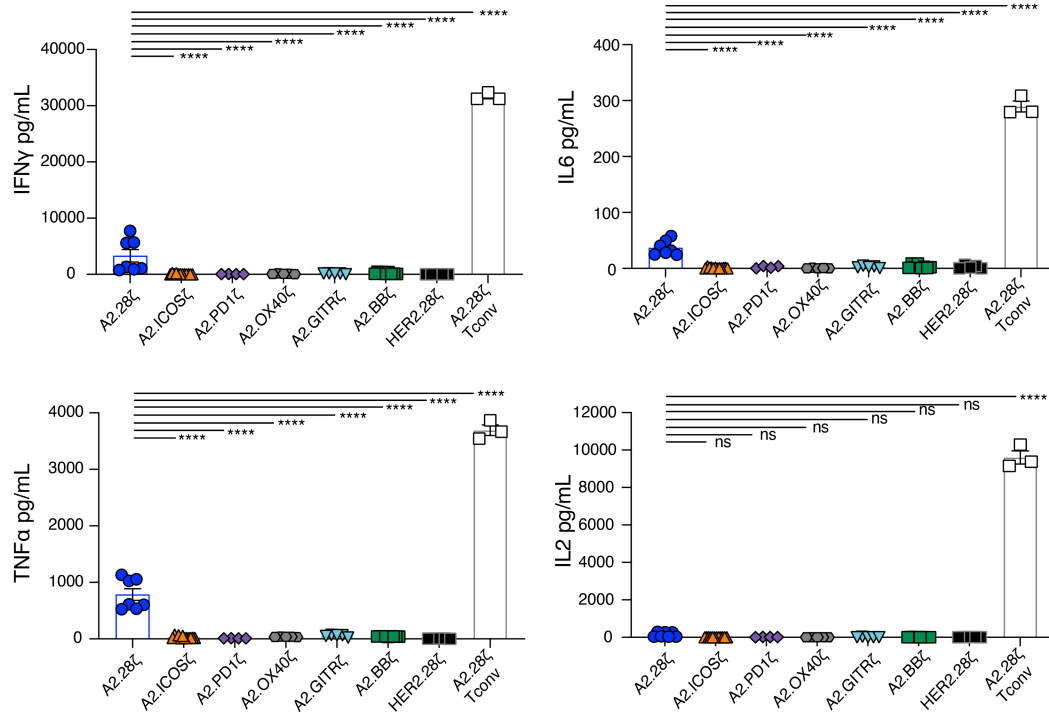

B

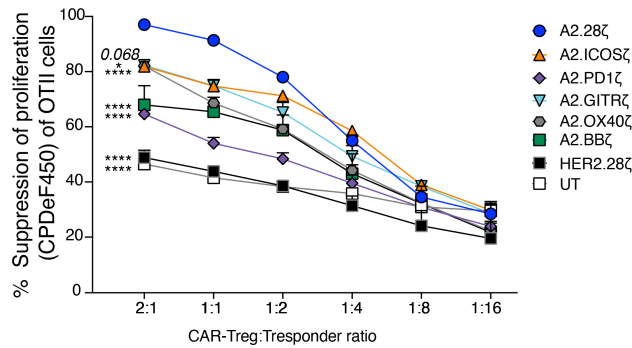

**Supplementary Figure 3: Supplementary data for the *in vitro* characterization of co-stimulatory domain CAR variants.** (A) Cytokine production of CAR-Tregs cultured for 3-days with HLA-A2<sup>+</sup> K562 cells; n=3 to 12 replicates from at least 3 independent experiments. (B) CAR-Treg suppression of the OTII CD4 T responder proliferation, as determined by CPDeF450 dilution; n=3 to 6 replicates from at least 2 independent experiments. UT = Untransduced. Data shown as mean±SEM. Statistical significance was determined using one-way (A) two-way (B) ANOVA with a Holm-Sidak post-test. \*p<0.05, \*\*p<0.01, \*\*\*p<0.001. \*\*\*\*p<0.0001.

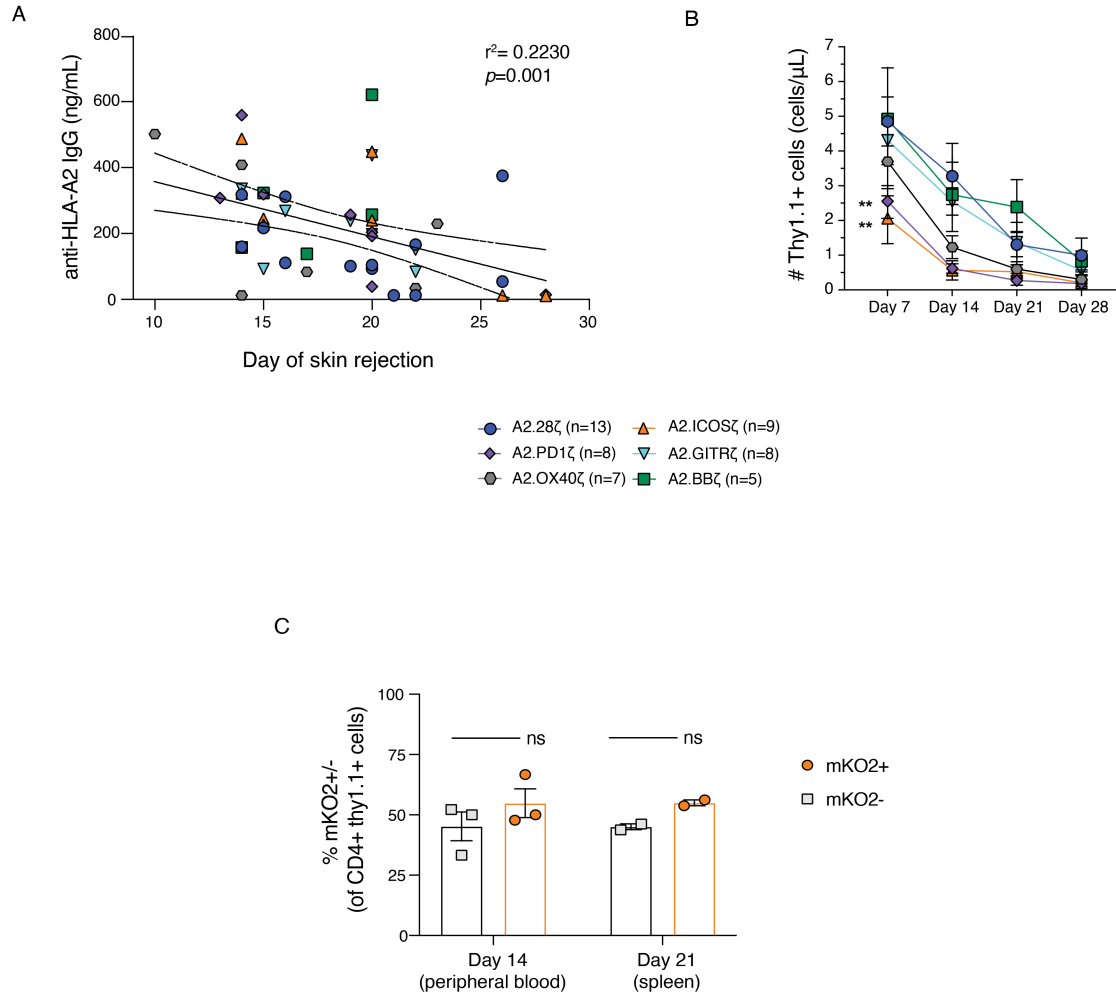

**Supplementary Figure 4: Supplementary data for the *in vivo* characterization of co-stimulatory domain CAR variants.** (A) Correlation between levels of anti-HLA-A2 IgG Abs in plasma at day 14 and skin graft rejection date of mice receiving Tregs bearing CD28 and TNFR family-based co-stimulatory domain CARs. (B) Count of CAR-Tregs in peripheral blood of mice transplanted with HLA-A2-expressing skin and intravenously administered with  $1 \times 10^6$  CAR-Tregs. (A-B)  $n=3$  to 13 mice per group from at least 4 individual experiments. (C) Relative frequencies of mKO2+ and mKO2- CAR-Tregs in peripheral blood and spleen;  $n=3$  mice per group from one experiment. BL/6 mice were transplanted with skin grafts from HLA-A2<sup>+</sup> BL/6 mice and intravenously administered  $5 \times 10^5$  mKO2<sup>pos</sup> and  $5 \times 10^5$  mKO2<sup>neg</sup> CD28-bearing CAR-Tregs. Data shown as mean $\pm$ SEM. Statistical significance was determined using Pearson Correlation (A), or two-way ANOVA (B-C) with a Holm-Sidak post-test. \* $p < 0.05$ , \*\* $p < 0.01$ , \*\*\* $p < 0.001$ . \*\*\*\* $p < 0.0001$ .



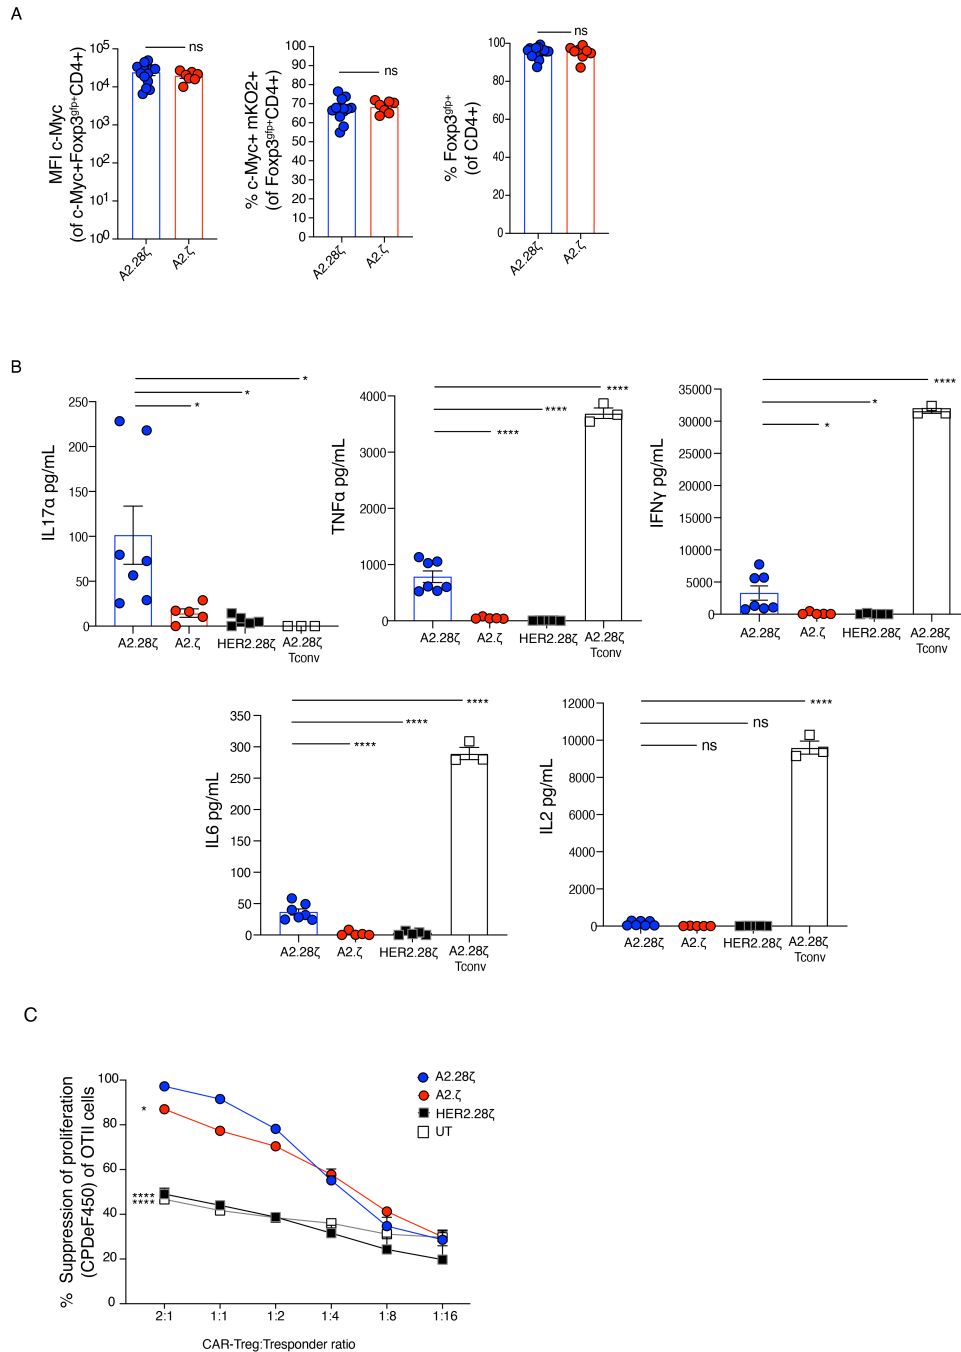

**Supplementary Figure 5: Supplementary material for the *in vitro* comparison of first- and second-generation CARs:** **(A)** MFI of CAR expression, co-expression of Myc and mKO2 and Foxp3<sup>fp</sup> expression for first- and second-generation CAR-Tregs after expansion, gated on total live Myc+CD4<sup>+</sup>Foxp3<sup>fp</sup> or live CD4<sup>+</sup> cells; n=7 to 16 replicates from at least 8 independent experiments. **(B)** Cytokine production of CAR-Tregs cultured for 3-days with HLA-A2<sup>pos</sup> K562 cells; n=3 to 7 replicates from 3 independent experiments **(C)** CAR-Treg suppression of the OTII CD4 T responder proliferation, as determined by CPDeF450 dilution; n=3 to 6 replicates from 2 independent experiments UT = Untransduced. Data shown as mean±SEM. Statistical significance was determined using t-student (**A**), one-way (**B**) two-way ANOVA (**C**) with a Holm-Sidak post-test. \*p<0.05, \*\*p<0.01, \*\*\*p<0.001. \*\*\*\*p<0.0001.

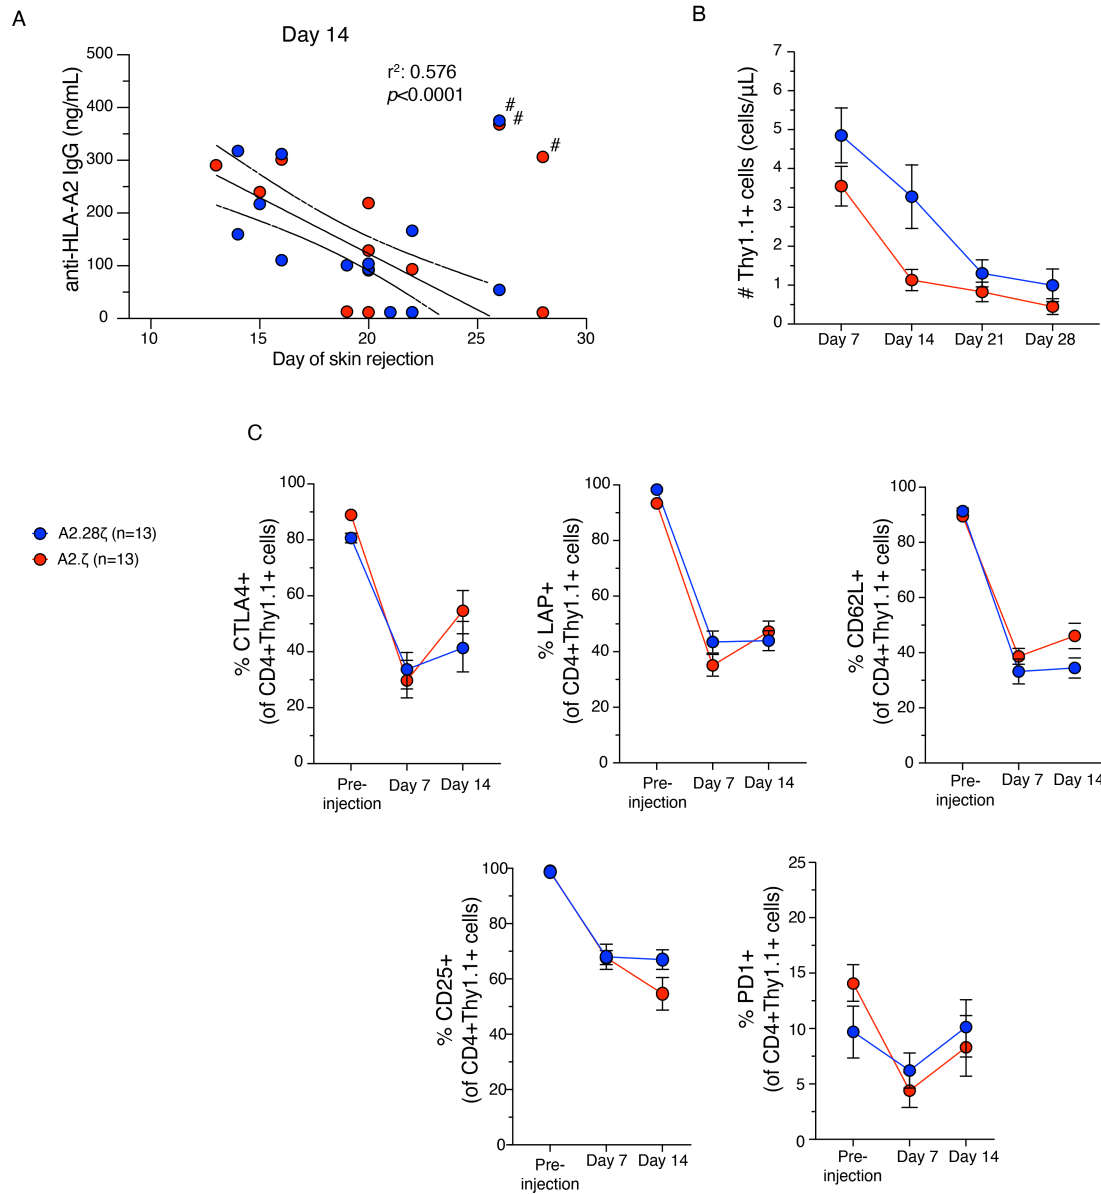

**Supplementary Figure 6:** *Supplementary material for the in vivo comparison of first- and second-generation CARs.* BL/6 mice were transplanted with skin grafts from syngeneic or HLA-A2<sup>+</sup> BL/6 mice and were intravenously administered  $1 \times 10^6$  CAR-Tregs. **(A)** Correlation between anti-HLA-A2 IgG Abs in plasma at day 14 and skin graft rejection from mice receiving Tregs bearing A2.28 $\zeta$  or A2. $\zeta$  CARs. # Outliers values excluded from linear regression analysis. **(B)** Counts of Thy1.1<sup>+</sup> CAR-Tregs of total CD45<sup>+</sup> T cells in peripheral blood over time. **(C)** Phenotype of Thy1.1<sup>+</sup>CD4<sup>+</sup> CAR-Tregs in peripheral blood over time including expression of CTLA-4, LAP, CD62L, CD25 and PD1. Data pooled from 3 individual in vivo experiments with n=3 to 13 mice per group and shown as mean $\pm$ SEM. Statistical significance was determined using Pearson Correlation (**A**) and two-way ANOVA with a Holm-Sidak post-test (**B,C**). \* $p < 0.05$ , \*\* $p < 0.01$ , \*\*\* $p < 0.001$ , \*\*\*\* $p < 0.0001$ .

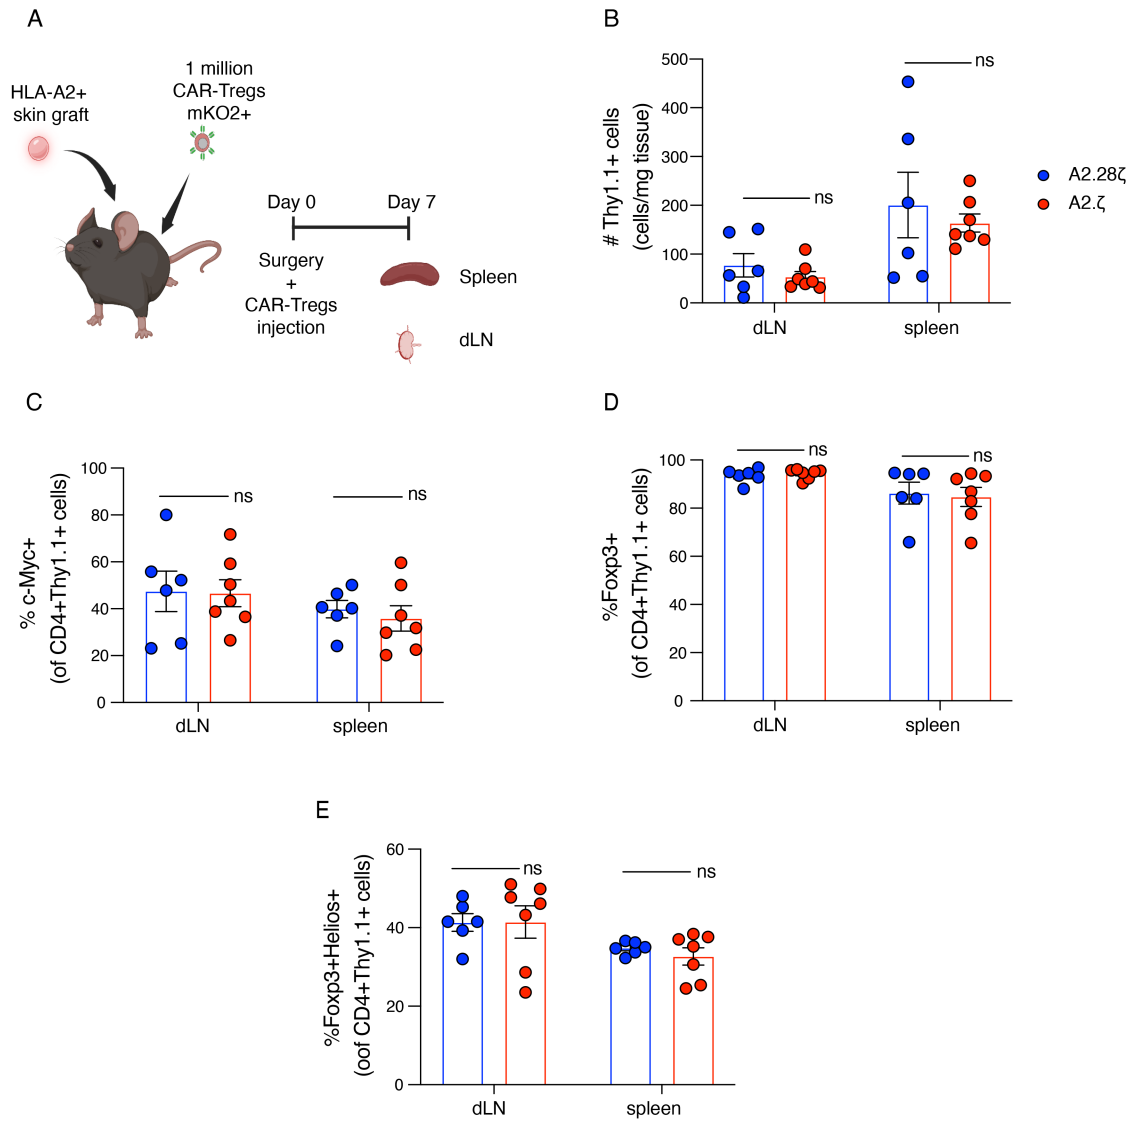

**Supplementary Figure 7: Study of first- and second-generation CAR-Tregs in lymphoid tissues.** (A) Schematic diagram of the study of first- and second-generation CAR-Tregs in lymphoid tissues. BL/6 mice were transplanted with skin grafts from HLA-A2<sup>+</sup> BL/6 mice and intravenously administered  $1 \times 10^6$  CAR-Tregs. Spleen and draining lymphoid node (dLN) were collected at day 7 post-infusion. (B) Numbers of first- and second-generation CAR-Tregs in dLN (left) and spleen (right). (C-F) CAR-Tregs expression of: (C) CAR (c-Myc+) (D), FoxP3 and (E) FoxP3 and Helios in dLN and spleen. Data are mean  $\pm$  SEM generated from two independent experiments; n=6 to 7 mice per group. Statistical significance was determined using Student's t-test with a Holm-Sidak post-test, \*p<0.05, \*\*p<0.01, \*\*\*p<0.001, \*\*\*\*p<0.0001.

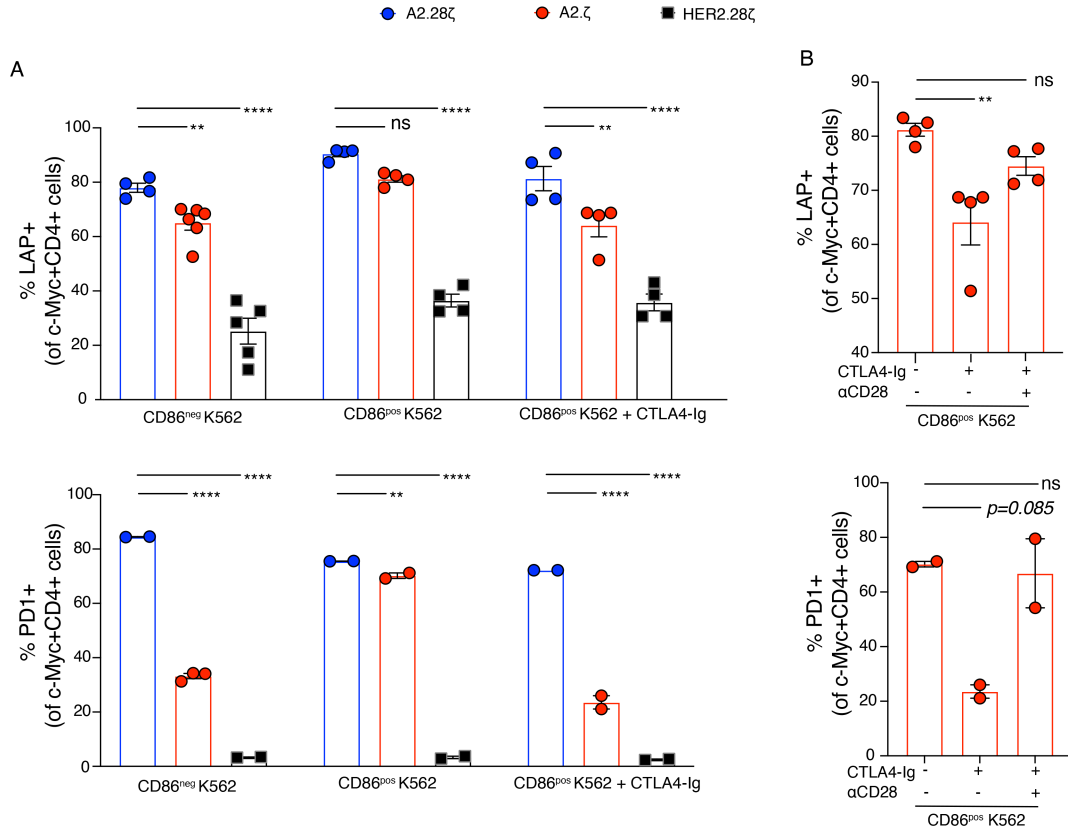

**Supplementary Figure 8:** *Supplementary material of the effects of a CAR-independent stimulation over the CAR-mediated activation and function of Tregs.* CAR-Tregs were co-cultured with CD86<sup>+</sup>HLA-A2<sup>+</sup> or CD86<sup>-</sup>HLA-A2<sup>+</sup> K562 cells at a 1:2 K562:Tregs ratio for 3 days. **(A-B)** LAP and PD1 expression in CAR-Tregs following 3-days of co-culture, gated on Myc+CD4<sup>+</sup> live cells. Where indicated, CTLA4-Ig or activating anti-CD28 mAbs were added at 10 mg/mL. N= 2 to 6 replicates from 2 or 1 independent experiments for LAP and PD1, respectively. Data is shown as mean±SEM. Statistical significance was determined using one-way **(B)** or two-way **(A)** ANOVA with a Holm-Sidak post-test, \*p<0.05, \*\*p<0.01, \*\*\*p<0.001, \*\*\*\*p<0.0001.

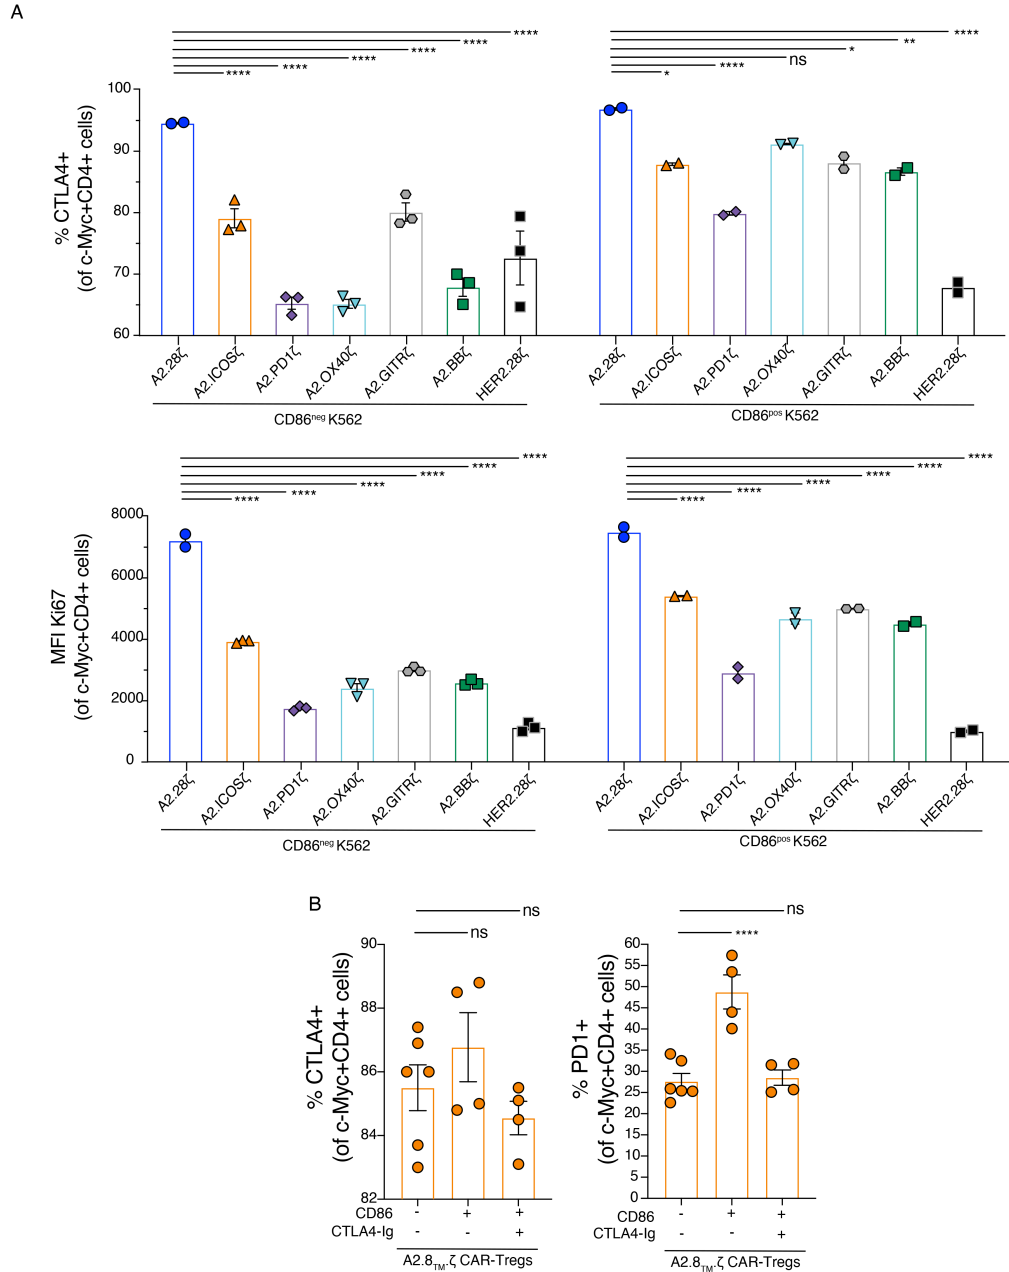

**Supplementary Figure 9: Supplementary material of the effects of a CAR-independent stimulation over the CAR-mediated activation and function of Tregs.** CAR-Tregs were co-cultured with CD86<sup>+</sup>HLA-A2<sup>+</sup> or CD86-HLA-A2<sup>+</sup> K562 cells at a 1:2 K562:Tregs ratio for 3 days. **(A)** CTLA4 and Ki67 expression in different co-stimulatory CAR-Tregs following 3-days of co-culture, gated on Myc+CD4<sup>+</sup> live cells; n=2 to 3 replicates from one experiment. **(B)** CTLA4 and PD1 expression in CD8 $\alpha$ -TM CAR-Tregs following 3-days of co-culture, gated on Myc+CD4<sup>+</sup> live cells; n=4 to 6 replicates from one experiment. Where indicated, CTLA4-Ig or activating anti-CD28 mAbs were added at 10  $\mu$ g/mL. Data are shown as mean $\pm$ SEM. Statistical significance was determined using one-way **(B)** or two-way **(A)** ANOVA with a Holm-Sidak post-test, \*p<0.05, \*\*p<0.01, \*\*\*p<0.001, \*\*\*\*p<0.0001.

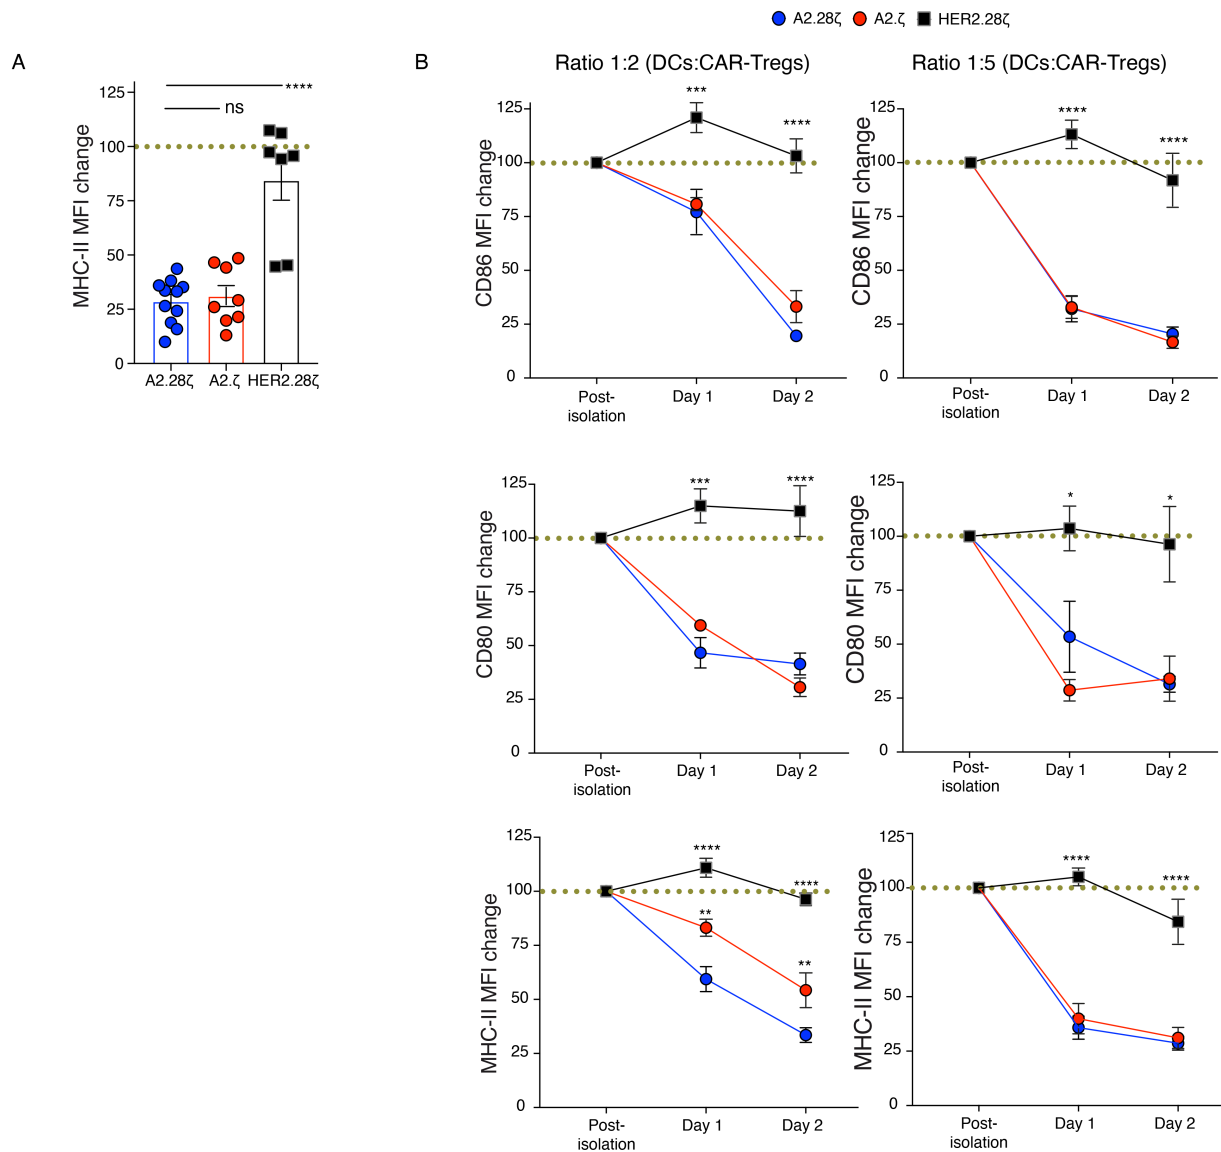

**Supplementary Figure 10: Supplementary material of the *in vitro* APC suppression by first- and second-generation CAR-Tregs.** CAR-Tregs were co-cultured with splenic HLA-A2<sup>+</sup> CD11c<sup>+</sup> DCs at a 1:2 or 1:5 DCs:Tregs for 1 or 2 days. **(A)** Expression of MHC-II in HLA-A2<sup>+</sup> CD11c<sup>+</sup> DCs after 2 days of culture with the indicated CAR-Tregs; n=7 to 11 replicates from at least 4 independent experiments. **(B)** Expression of CD80, CD86 and MHC-II in HLA-A2<sup>+</sup> CD11c<sup>+</sup> DCs cultured at different time points and with different ratios of DCs/CAR-Tregs; n=6 to 15 replicates from at least 4 independent experiments. Data are shown relative to DCs cultured with untransduced Tregs which were normalized to 100% (dotted lines). Data are shown as mean±SEM. Statistical significance was determined using one-way (A) or two-way (B) ANOVA with a Holm-Sidak post-test, \*p<0.05, \*\*p<0.01, \*\*\*p<0.001, \*\*\*\*p<0.0001.

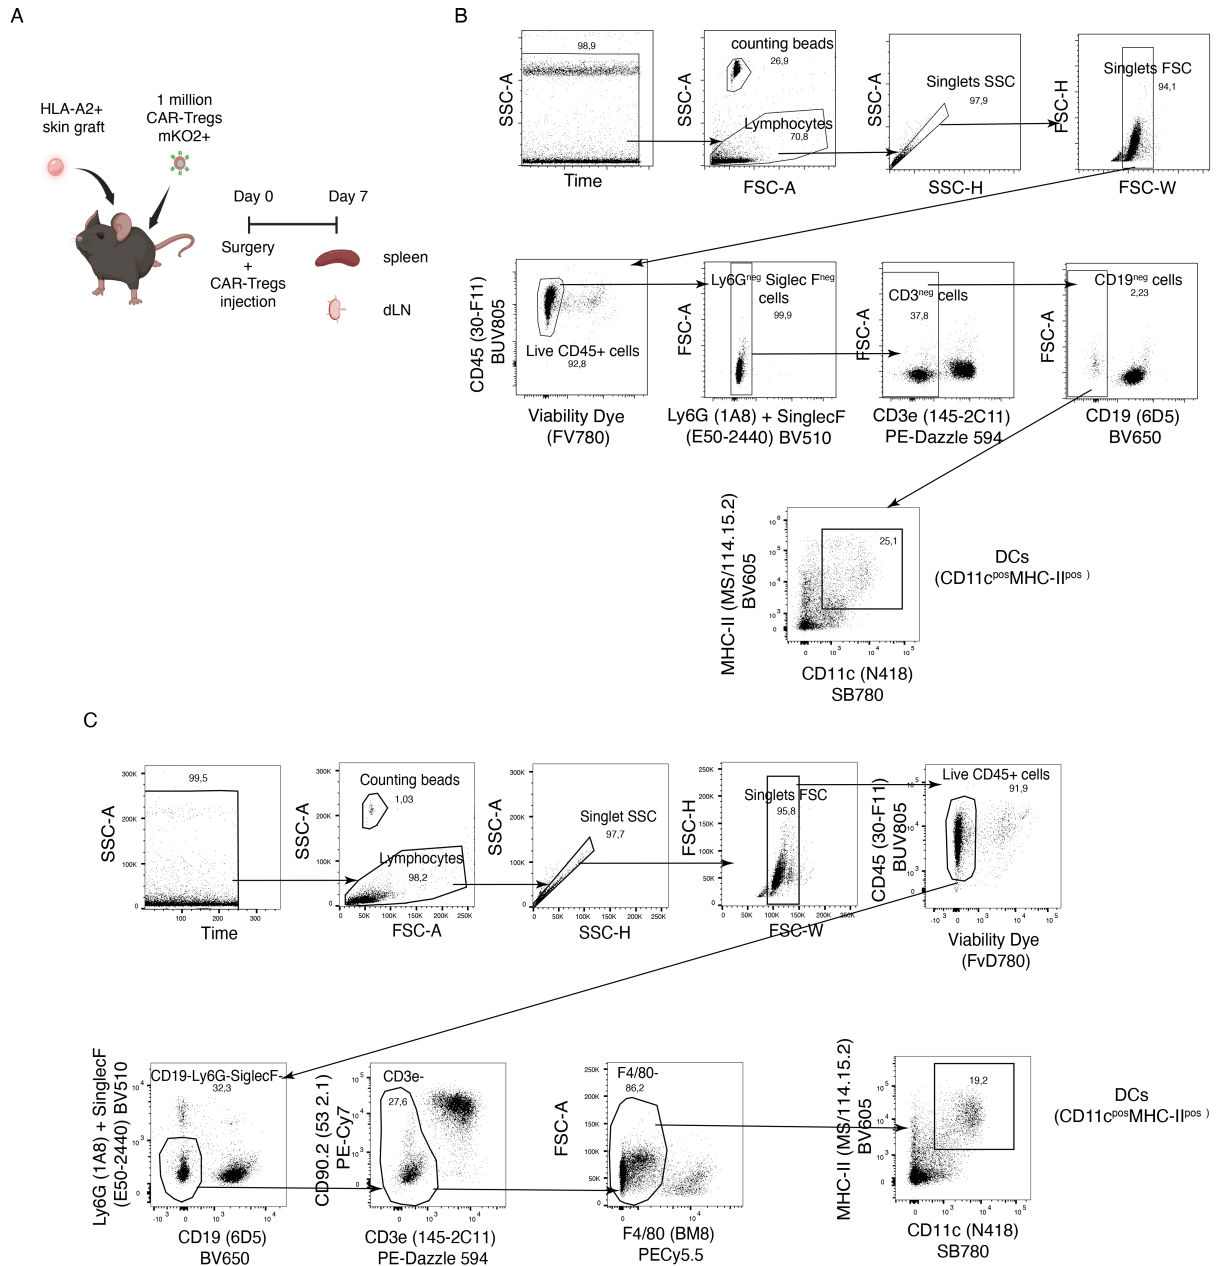

**Supplementary Figure 11: Study design and flow panels of the *in vivo* study of CAR-Treg modulation of co-stimulatory and MHC-II molecules expression in APCs.** (A) Schematic diagram of the study of first- and second-generation CAR-Tregs modulation of co-stimulatory and MHC-II molecules expression in APCs. BL/6 mice were transplanted with skin grafts from HLA-A2<sup>+</sup> BL/6 mice and intravenously administered 1x10<sup>6</sup> CAR-Tregs. Spleen and draining lymphoid node (dLN) were collected at day 7 post-infusion. (B) Representative data of one experiment showing the flow panel used to study dendritic cells (DCs) in dLNs (defined as live CD45<sup>pos</sup>Ly6G<sup>neg</sup>SiglecF<sup>neg</sup>CD3e<sup>neg</sup>CD19<sup>neg</sup>CD11c<sup>pos</sup>MHCII<sup>pos</sup>). (C) Representative data of one experiment showing the flow panel used to study DCs in spleen (defined as live CD45<sup>pos</sup>Ly6G<sup>neg</sup>SiglecF<sup>neg</sup>CD19<sup>neg</sup>CD3e<sup>neg</sup>F4/80<sup>neg</sup>CD11c<sup>pos</sup>MHCII<sup>pos</sup>).

**Supplementary Table 1**

| <b>CAR</b>                | <b>Specificity</b> | <b>Hinge</b> | <b>Transmembrane domain</b>        | <b>Costimulatory domain</b>                                                                                                                                                                                              |
|---------------------------|--------------------|--------------|------------------------------------|--------------------------------------------------------------------------------------------------------------------------------------------------------------------------------------------------------------------------|
| A2.28ζ                    | HLA-A2             | CD8α-derived | FWALVVVAGVLFYGLLVTV<br>LCVIWT      | NSRRNRLQLQSDYMNMT<br>PRRPGLTR<br>KPYQPYAPARDFAAAYRP                                                                                                                                                                      |
| A2.ICOSζ                  | HLA-A2             | CD8α-derived | PVGCAAFVVVLLFGCILIIWF              | SKKKYGSVHDPNSEYMFMAAVNT<br>NKKSRLAGVTS                                                                                                                                                                                   |
| A2.PD1ζ                   | HLA-A2             | CD8α-derived | FWALVVVAGVLFYGLLVTV<br>LCVIWT      | AVFCSTSMSEARGAGSKDDTLKEEP<br>SAAPVPSVAYEELDFQGREKTPELP<br>TACVHTEYATIVFTEGLGASAMGR<br>GSADGLQGPRPPRHEDGHCSWPL                                                                                                            |
| A2.CTLA4ζ                 | HLA-A2             | CD8α-derived | FWALVVVAGVLFYGLLVTV<br>LCVIWT      | AVSLSKMLKKRSPLTTGVYVKMPP<br>TEPECEKQFQPYFIPIN                                                                                                                                                                            |
| A2.GITRζ                  | HLA-A2             | CD8α-derived | LTVIFLVMAACIFLTTVQLG               | LHIWQLRRQHMCPRQTQPF<br>AEVQLS<br>AEDACSFQFPEEERGEQTEEKCHLG<br>GRWP                                                                                                                                                       |
| A2.OX40ζ                  | HLA-A2             | CD8α-derived | AFAVLLGLGLLAPLTVLLAL<br>YLL        | RKAWRLPNTPKPCWGN<br>SFRTPIQEE<br>HTDAHFTLAKI                                                                                                                                                                             |
| A2.BBζ                    | HLA-A2             | CD8α-derived | TLFLALTSALLLALIFITLLF              | SVLKWIRKKFPHIFKQPFKKTGAA<br>QEEDACSCRCPQEEEGGGGYEL                                                                                                                                                                       |
| A2.TNFRζ                  | HLA-A2             | CD8α-derived | ISLPIGLIVGVTSLGLLMLGLVN<br>CIILVQR | KKKPSCLQRDAKVPHVPDEKSQDA<br>VGLEQQHLLTTAPSSSSSSLESSASA<br>GDRRAPPGGHPQARVMAEAQGFQE<br>ARASSRISDSSHGSHGTHVNVTCIVN<br>VCSSSDHSSQCSSQASATVGDPDAK<br>PSASPKDEQVPFSQEECPSPCETT<br>ETLQSHEKPLPLGV<br>PDMGMKPSQA<br>GWFDQIAVKVA |
| A2.ζ                      | HLA-A2             | CD8α-derived | FWALVVVAGVLFYGLLVTV<br>LCVIWT      |                                                                                                                                                                                                                          |
| HER2.28ζ                  | HER2               | CD8α-derived | FWALVVVAGVLFYGLLVTV<br>LCVIWT      | NSRRNRLQLQSDYMNMT<br>PRRPGLTR<br>KPYQPYAPARDFAAAYRP                                                                                                                                                                      |
| A2.8 <sub>TM</sub> .28ζ   | HLA-A2             | CD8α-derived | IWAPLAGICVALLLSLIITLI              | NSRRNRLQLQSDYMNMT<br>PRRPGLTR<br>KPYQPYAPARDFAAAYRP                                                                                                                                                                      |
| A2.8 <sub>TM</sub> . ζ    | HLA-A2             | CD8α-derived | IWAPLAGICVALLLSLIITLI              |                                                                                                                                                                                                                          |
| HER2.8 <sub>TM</sub> .28ζ | HER2               | CD8α-derived | IWAPLAGICVALLLSLIITLI              | NSRRNRLQLQSDYMNMT<br>PRRPGLTR<br>KPYQPYAPARDFAAAYRP                                                                                                                                                                      |



**Supplementary Table 2: List of antibodies and other reagents used in the study**

| <b>Target</b>             | <b>Clone</b> | <b>Fluorophore</b>     | <b>Company</b>             |
|---------------------------|--------------|------------------------|----------------------------|
| CD4                       | GK1.5        | BV785                  | BD Biosciences             |
| CD4                       | RM4-5        | BUV563                 | BD Biosciences             |
| CD45                      | 30-F11       | BUV805                 | BD Biosciences             |
| LAP                       | Tw7-16B4     | PerCP-e710             | BD Biosciences             |
| PD1                       | RMP1-30      | BV711                  | BD Biosciences             |
| CD25                      | PC61         | BUV395                 | BD Biosciences             |
| CD80                      | 16-10A1      | FITC or BUV395         | BD Biosciences             |
| CD86                      | GL1          | APC                    | BD Biosciences             |
| CD8                       | 53-6.7       | PE or AF647            | BD Biosciences             |
| CD3e                      | 145-2C11     | PE-Dazzle 594          | BD Biosciences             |
| Ly6G                      | 1A8          | BV510                  | BD Biosciences             |
| Siglec F                  | E50-2440     | BV510                  | BD Biosciences             |
| Thy1.1                    | HIS51        | PE or BUV496           | eBioscience                |
| Thy1.2                    | 53 2.1       | BV510 or PECy7         | eBioscience                |
| Ki67                      | SolA15       | AF700                  | eBioscience                |
| FoxP3                     | FJK-16s      | FITC or PECy7          | eBioscience                |
| CD11c                     | N418         | SB780                  | eBioscience                |
| Helios                    | 22F6         | PE-Dazzle 594 or eF450 | Biolegend                  |
| F4/80                     | BM8          | PE-Cy5                 | Biolegend                  |
| CTLA4                     | UC10-4B9     | BV605                  | Biolegend                  |
| I-A/I-E (MHC-II)          | MS/114.15.2  | BV605                  | Biolegend                  |
| CD62L                     | MEL-14       | AF647                  | Biolegend                  |
| CD19                      | 6D5          | BV650                  | Biolegend                  |
| cMyc                      | 9E10         | AF647 or AF488         | UBC Ablab                  |
| Streptavidin              |              | APC                    | BD Biosciences             |
| Streptavidin              |              | PE                     | BD Biosciences             |
| HLA-A2:01 Biotin monomer  |              |                        | NIH Tetramer Core Facility |
| Goat anti-Mouse IgG (H+L) | Polyclonal   | APC                    | Invitrogen                 |
|                           |              |                        |                            |
